# Supplementary material for: Host Range Determinants of Pseudomonas savastanoi Pathovars of Woody Hosts Revealed by Comparative Genomics and Cross-Pathogenicity Tests
Source: Front Plant Sci. 2020 Jul 2;11:973. doi: 10.3389/fpls.2020.00973 (PMC7343908; doi:10.3389/fpls.2020.00973)
Supplement: Supplementary file 2 [file Table_1.xlsx]

## Sheet: Genes used for MLSA phylogeny
Gene ID (P. savastanoi pv. savastanoi NCPPB 3335)	Product
PSA3335_RS00020	DNA topoisomerase (ATP-hydrolyzing) subunit B gyrB
PSA3335_RS00080	glycine--tRNA ligase subunit beta
PSA3335_RS00595	N-acetyltransferase
PSA3335_RS00655	gabD NAD-dependent succinate-semialdehyde dehydrogenase
PSA3335_RS00970	phosphate ABC transporter permease
PSA3335_RS01155	peptide transporter
PSA3335_RS02230	sarcosine oxidase subunit alpha
PSA3335_RS02315	malate synthase G
PSA3335_RS02485	NAD(P)/FAD-dependent oxidoreductase
PSA3335_RS03020	RNA polymerase sigma factor RpoD
PSA3335_RS03605	DNA-directed RNA polymerase subunit beta rpoB
PSA3335_RS07445	DNA recombination/repair protein RecA
PSA3335_RS08930	methyltransferase domain-containing protein
PSA3335_RS09155	FAD-dependent oxidoreductase
PSA3335_RS09375	ABC transporter ATP-binding protein
PSA3335_RS09700	glycosyl transferase
PSA3335_RS10150	acriflavine resistance protein B
PSA3335_RS10225	cytochrome o ubiquinol oxidase subunit I
PSA3335_RS10945	tRNA-guanine(34) transglycosylase
PSA3335_RS12400	glycosyl transferase
PSA3335_RS12555	flagellin fliC
PSA3335_RS15150	metalloprotease
PSA3335_RS19840	citrate (Si)-synthase cts
PSA3335_RS21830	MFS transporter
PSA3335_RS22580	aromatic amino acid transporter AroP
PSA3335_RS23225	DNA gyrase subunit A
PSA3335_RS23265	GGDEF domain-containing protein
PSA3335_RS25730	carbamoyltransferase
PSA3335_RS25780	pyruvate dehydrogenase (acetyl-transferring), homodimeric type
PSA3335_RS26055	alanine transaminase
PSA3335_RS26370	glutamate synthase large subunit
PSA3335_RS26420	penicillin-binding protein 1A
PSA3335_RS27220	outer membrane porin, OprD family
PSA3335_RS27285	1-(5-phosphoribosyl)-5-((5- phosphoribosylamino)methylideneamino)imidazole-4- carboxamide isomerase
PSA3335_RS27350	catalase HPII
PSA3335_RS27460	4-hydroxy-3-polyprenylbenzoate decarboxylase
PSA3335_RS27690	transketolase
PSA3335_RS28085	FAD-binding oxidoreductase
PSA3335_RS28305	ammonium transporter
PSA3335_RS28420	phosphoenolpyruvate carboxykinase
